# Supplementary material for: A Model-Based Method for Gene Dependency Measurement
Source: PLOS journal article supplement (doi:10.1371/journal.pone.0040918), 2012-07-19
Supplement: S2 (10.1371/journal.pone.0040918.s002) [file journal.pone.0040918.s002]

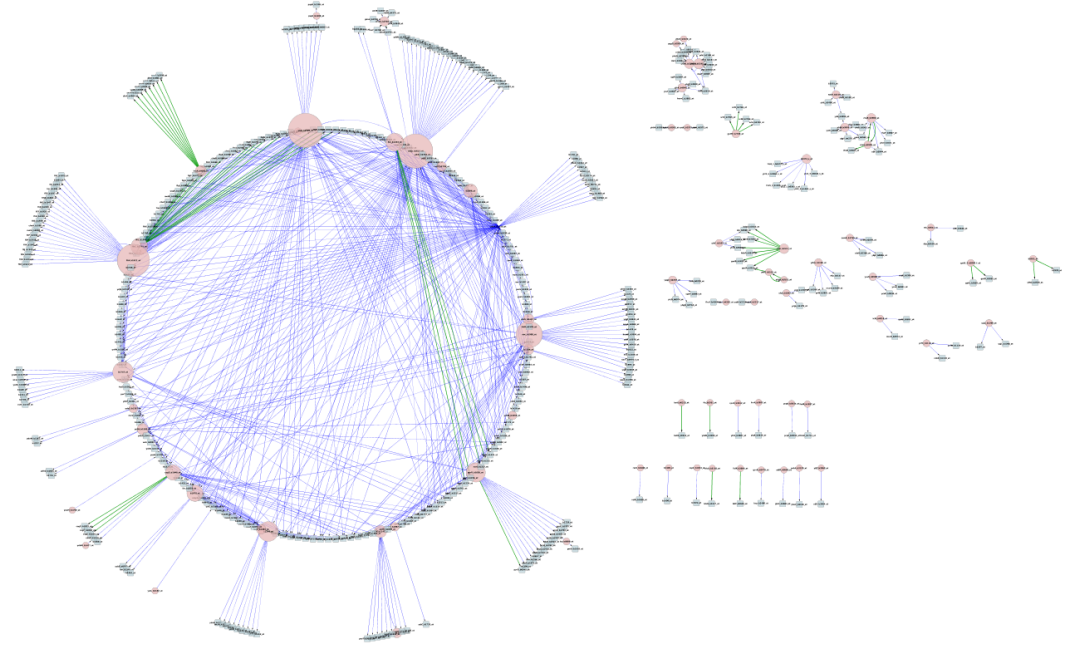

**Figure S2. The recovered regulation network with 60% precision based on *E.coli* dataset.** Pink and blue circles correspond to the transcription factors and target genes respectively. The size of the circle corresponds to the out-degree of gene in this network. Green arrows represent the interactions including in RegulonDB.
