# Supplementary material for: A Model-Based Method for Gene Dependency Measurement
Source: PLOS journal article supplement (doi:10.1371/journal.pone.0040918), 2012-07-19
Supplement: S3 (10.1371/journal.pone.0040918.s003) [file journal.pone.0040918.s003]

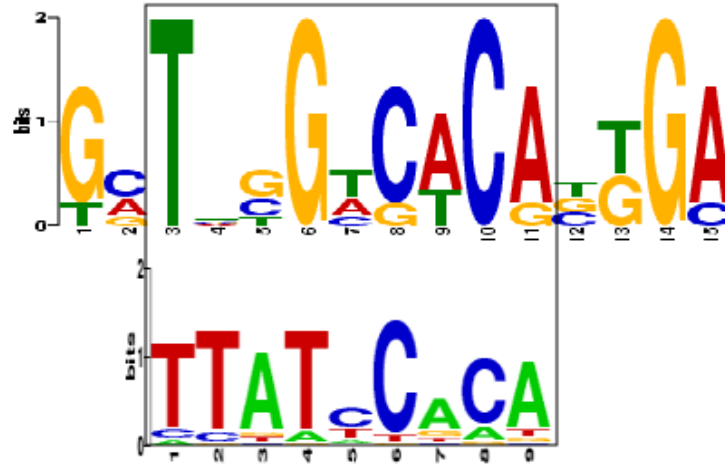

**Figure S3 (a).** Motif detected for transcription factor *dnaA*. The *dnaA* regulatory motif detected in the promoters of the 6 inferred target operons(upper) compared to the motif identified in PRODORIC(lower).

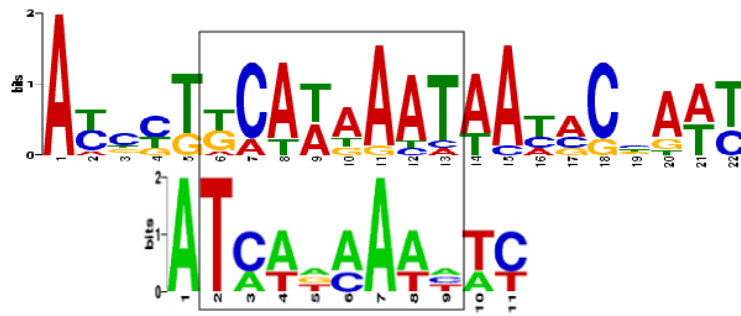

**Figure S3 (b).** Motif detected for transcription factor *nac*. The *nac* regulatory motif detected in the promoters of 11 inferred target operons(upper) compared to the motif identified in PRODORIC(lower).
